# Supplementary material
Source: Springer Nature journal article supplement (https://www.springermedizin.de/resource/supplementary/12974_2011_413_MOESM4_ESM.pdf/9601588)

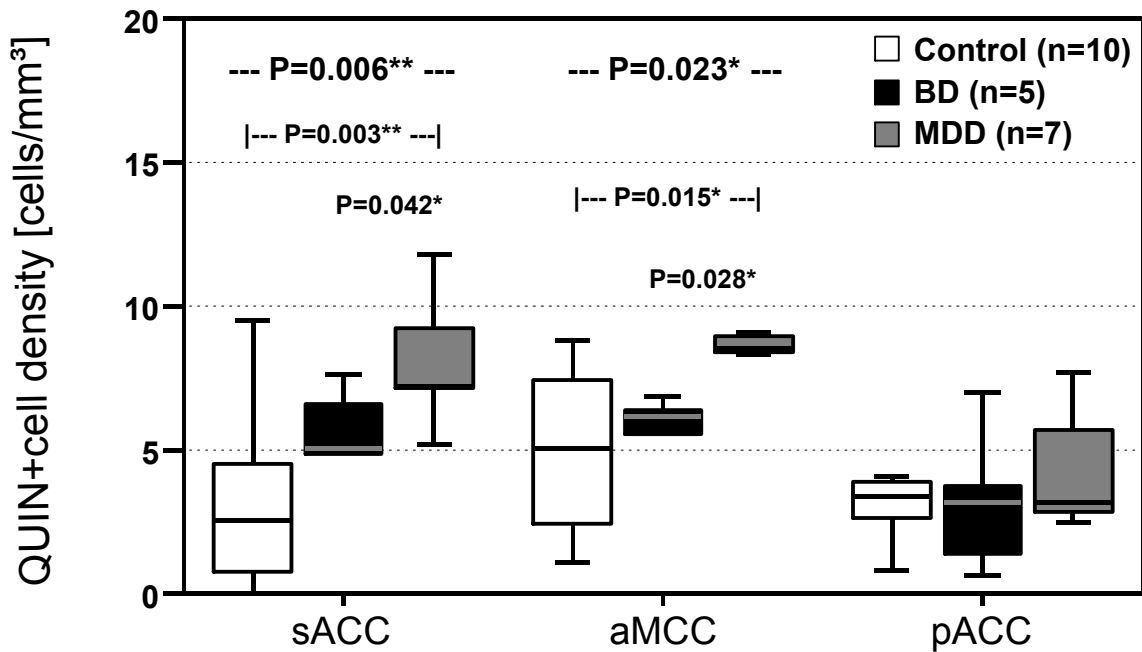

Supplement: MOESM4 [file 9601588]
